# Supplementary material for: Higher efficacy of anti-IL-6/IL-21 combination therapy compared to monotherapy in the induction phase of Th17-driven experimental arthritis
Source: PubMed Central journal article supplement (PMC5291406; doi:10.1371/journal.pone.0171757), 2017-02-03
Supplement: pone.0171757.s001.pdf [file pone.0171757.s001.pdf]

## S1 Table. Supporting data Figures 1-6.

Figure 1

Fig 1B. % IL-17+ of CD4+

| WT + IL-6 | WT - IL-6 | IL-21R <sup>-/-</sup> + IL-6 | IL-21R <sup>-/-</sup> - IL-6 |
|-----------|-----------|------------------------------|------------------------------|
| 98        | 62,8      | 14,7                         | 2,75                         |
| 99,9      | 75,6      | 81,7                         | 3,69                         |
| 93,2      | 70        | 90,4                         | 2,26                         |
| 33,9      | 19        | 93,6                         | 1,81                         |
| 45,8      | 24,2      | 71,6                         | 7,37                         |
| 99,9      | 19,4      | 83,9                         | 83,8                         |
| 98,6      | 20,6      | 94,1                         |                              |
| 98,6      | 37,6      | 96,1                         |                              |
| 98,8      | 53        |                              |                              |
| 98,4      | 80,5      |                              |                              |

Fig 1C . IL-17 level (pg/ml)

| WT + IL-6 | WT - IL-6 | IL-21R <sup>-/-</sup> + IL-6 | IL-21R <sup>-/-</sup> - IL-6 |
|-----------|-----------|------------------------------|------------------------------|
| 4563,035  | 3328,92   | 4032,545                     | 1999,51                      |
| 4064,135  | 3339,755  | 4180,545                     | 2059,435                     |
| 4234,12   | 3386,285  | 4408,975                     | 1571,715                     |
| 3718,895  | 2905,245  | 4742,21                      | 1361,53                      |
| 4718,675  | 3616,67   | 4235,83                      | 2856,7                       |
| 4884,9    | 3211,45   | 4562,36                      | 3274,32                      |
| 4874,445  | 3345,555  | 4382,935                     |                              |
| 4201,505  | 2975,965  | 4854,315                     |                              |
| 4415,79   | 3180,965  |                              |                              |
| 4692,82   | 3037,315  |                              |                              |

Fig 1D . IL-21 level (pg/ml)

| WT + IL-6 | WT - IL-6 | IL-21R <sup>-/-</sup> + IL-6 | IL-21R <sup>-/-</sup> - IL-6 |
|-----------|-----------|------------------------------|------------------------------|
| 3499,105  | 1,33      | 369,065                      | 0,915                        |
| 4988,15   | 2,15      | 5689,495                     | 1,33                         |
| 3573,415  | 1,33      | 3378,84                      | 3,01                         |
| 2281,225  | OOR<      | 6461,205                     | 0,51                         |
| 2669,105  | 1,33      | 8265,615                     | OOR<                         |
| 4714,65   | 2,58      | 5294,59                      | 2,15                         |
| 4271,87   | 2,19      | 8825,035                     |                              |
| 456,12    | OOR<      | 6073,625                     |                              |
| 3316,44   | 2,15      |                              |                              |
| 4223,53   | 0,915     |                              |                              |

Fig 1E . IL-22 level (pg/ml)

| WT + IL-6 | WT - IL-6 | IL-21R <sup>-/-</sup> + IL-6 | IL-21R <sup>-/-</sup> - IL-6 |
|-----------|-----------|------------------------------|------------------------------|
| 669,93    | 7,805     | 664,795                      | 4,805                        |
| 627,995   | 7,5       | 315,84                       | 3,255                        |
| 650,07    | 7,555     | 381,035                      | 3,77                         |
| 678,035   | 12,54     | 390,12                       | 3,275                        |
| 696,795   | 13,225    | 341,975                      | 14,27                        |
| 709,865   | 11,455    | 397,415                      | 7,555                        |
| 590,75    | 11,685    | 256,38                       |                              |
| 636,48    | 6,035     | 571,915                      |                              |
| 633,595   | 13,66     |                              |                              |
| 607,945   | 13,835    |                              |                              |

OOR< Out of Range Below

Figure 2

Fig 2A. % IL-17+ of CD4+

| WT   | IL-6 <sup>-/-</sup> | IL-21R <sup>-/-</sup> | IL-6 <sup>-/-</sup> x IL-21R <sup>-/-</sup> |
|------|---------------------|-----------------------|---------------------------------------------|
| 0,36 | 0,13                | 0,2                   | 0,07                                        |
| 0,26 | 0,12                | 0,19                  | 0,05                                        |
| 0,23 | 0,11                | 0,19                  | 0,07                                        |
| 0,17 | 0,12                | 0,16                  | 0,05                                        |
| 0,23 | 0,06                | 0,17                  | 0,03                                        |
| 0,27 | 0,08                | 0,12                  | 0,02                                        |
| 0,3  | 0,07                | 0,09                  | 0,05                                        |
| 0,27 | 0,07                | 0,07                  | 0,07                                        |
| 0,29 | 0,07                | 0,2                   | 0,07                                        |
| 0,33 | 0,11                | 0,21                  | 0,04                                        |

Fig 2B. Antibody titer (OD/50)

|                  | WT    | IL-6 <sup>-/-</sup> | IL-21R <sup>-/-</sup> | IL-6 <sup>-/-</sup> x IL-21R <sup>-/-</sup> |
|------------------|-------|---------------------|-----------------------|---------------------------------------------|
| <b>IgG1</b>      | 33350 | 4542                | 11734                 | 199,6                                       |
|                  | 10328 | 4947                | 1803                  | 140,9                                       |
|                  | 11734 | 3543                | 390,2                 | OOR<                                        |
|                  | 6572  | 948                 | 279,7                 | 550                                         |
|                  | 8944  | 1960                | 206,4                 | 33,48                                       |
| <b>IgG2b</b>     | 12820 | 701                 | 18177                 | OOR<                                        |
|                  | 18778 | 375,4               | 439,5                 | 56,72                                       |
|                  | 2537  | 394,9               | 119,5                 | OOR<                                        |
|                  | 10572 | 353                 | 166,7                 | OOR<                                        |
|                  | 1814  | 550,4               | 74,63                 | 47,88                                       |
| <b>IgG Total</b> | OOR>  | 5018                | OOR<                  | 30,66                                       |
|                  | OOR>  | 2588                | 5236                  | 4107                                        |
|                  | 98052 | 3793                | 15,3                  | OOR<                                        |
|                  | OOR>  | 2081                | 1002                  | 6175                                        |
|                  | 5935  | 4293                | 249,6                 | 315,8                                       |

OOR< Out of Range Below

Figure 3

Fig 3A. Joint swelling day 1 (R/L ratio)

| WT   | IL-6 <sup>-/-</sup> | IL-21R <sup>-/-</sup> | IL-6 <sup>-/-</sup> x IL-21R <sup>-/-</sup> |
|------|---------------------|-----------------------|---------------------------------------------|
| 1,74 | 1,6                 | 1,52                  | 1,22                                        |
| 1,66 | 1,6                 | 1,51                  | 1,5                                         |
| 1,56 | 1,74                | 1,54                  | 1,44                                        |
| 1,73 | 1,52                | 1,47                  | 1,19                                        |
| 1,75 | 1,6                 | 1,55                  | 1,31                                        |
| 2    | 1,68                | 1,41                  | 1,29                                        |

Fig 3B. Joint swelling day 2 (R/L ratio)

| WT   | IL-6 <sup>-/-</sup> | IL-21R <sup>-/-</sup> | IL-6 <sup>-/-</sup> x IL-21R <sup>-/-</sup> |
|------|---------------------|-----------------------|---------------------------------------------|
| 1,5  | 1,29                | 1,34                  | 1,25                                        |
| 1,63 | 1,3                 | 1,32                  | 1,16                                        |
| 1,37 | 1,32                | 1,28                  | 1,15                                        |
| 1,61 | 1,38                | 1,25                  | 1,22                                        |
| 1,55 | 1,4                 | 1,33                  | 1,17                                        |
| 1,64 | 1,28                | 1,38                  | 1,24                                        |

Fig 3C. Joint swelling day 4 (R/L ratio)

| WT   | IL-6 <sup>-/-</sup> | IL-21R <sup>-/-</sup> | IL-6 <sup>-/-</sup> x IL-21R <sup>-/-</sup> |
|------|---------------------|-----------------------|---------------------------------------------|
| 1,25 | 1,02                | 0,98                  | 1,07                                        |
| 1,13 | 1,03                | 1,06                  | 0,92                                        |
| 1,25 | 1,13                | 1,08                  | 1,05                                        |
| 1,18 | 1,08                | 1,02                  | 1,06                                        |
| 1,25 | 1                   | 0,95                  | 1,05                                        |
| 1,32 | 0,98                | 1,06                  | 1,01                                        |

Fig 3D. Histological score (0-3)

|              | WT           | IL-6 <sup>-/-</sup> | IL-21R <sup>-/-</sup> | IL-6 <sup>-/-</sup> x IL-21R <sup>-/-</sup> |      |
|--------------|--------------|---------------------|-----------------------|---------------------------------------------|------|
| Inflammation | 1,5          | 0,5                 | 0,25                  | 0,25                                        |      |
|              | 2            | 0,75                | 1                     | 0,5                                         |      |
|              | 0,75         | 0,25                | 1,75                  | 0,25                                        |      |
|              | 2,25         | 0,5                 | 0,5                   | 0                                           |      |
|              | 1,75         | 1                   | 0,25                  | 0,25                                        |      |
|              | 0,75         | 0,75                | 0,5                   | 0,5                                         |      |
|              | 1,25         | 0,5                 | 0,25                  | 0                                           |      |
|              | 1,25         | 0,5                 | 0,5                   | 0,5                                         |      |
|              | 1,75         | 0,5                 | 0,5                   | 0,25                                        |      |
|              | 2            | 0,75                | 0,5                   | 0,5                                         |      |
|              | PG Depletion | 3                   | 0,75                  | 0,5                                         | 0    |
|              |              | 3                   | 2                     | 2,25                                        | 0,25 |
|              |              | 2,75                | 0,75                  | 2,75                                        | 0    |
| 2,75         |              | 0,5                 | 0,5                   | 0,25                                        |      |
| 2,75         |              | 2,25                | 0,5                   | 0,5                                         |      |
| 2,5          |              | 1,25                | 0,5                   | 0,25                                        |      |
| 2,75         |              | 1                   | 0,25                  | 1,25                                        |      |
| 2,75         |              | 1,25                | 1                     | 1                                           |      |
| 2,75         |              | 0,75                | 0,5                   | 0,25                                        |      |
| 2,75         |              | 0,5                 | 0,25                  | 0,5                                         |      |
| Bone erosion | 1,487692     | 1,308462            | 1,103077              | 1,282308                                    |      |
|              | 1,769231     | 1,281538            | 1,358462              | 1,307692                                    |      |
|              | 1,357692     | 1,308462            | 1,717692              | 1,359231                                    |      |
|              | 1,897692     | 1,153846            | 1,307692              | 1,230769                                    |      |
|              | 1,744615     | 1,179231            | 1,307692              |                                             |      |
|              | 1,41         | 1,178462            | 1,205385              | 1,359231                                    |      |
|              | 1,281538     | 1,153846            | 1,026154              | 1,102308                                    |      |
|              | 1,359231     | 1,283077            | 1,076923              | 1,281538                                    |      |
|              | 1,691538     | 1,333077            | 1,356923              | 1,102308                                    |      |
|              | 1,82         | 1,050769            | 1,204615              | 1,409231                                    |      |

Figure 4

Fig 4A. % IL-17+ of CD3+CD4+

|                 | Rat IgG1 | $\alpha$ -IL-6R Ab | sIL-21R.Fc | Combination |
|-----------------|----------|--------------------|------------|-------------|
| Early treatment | 2        | 0,54               | 1,13       | 1,67        |
|                 | 4,1      | 1,14               | 0,91       | 1,08        |
|                 | 1,45     | 1,46               | 0,99       | 1,2         |
|                 | 1,87     | 1,13               | 1,12       | 1,03        |
|                 | 2,09     | 1,06               | 0,72       | 1,05        |
| Late treatment  | 1,04     | 0,64               | 0,94       | 0,83        |
|                 | 0,74     | 0,93               | 0,88       | 2,74        |
|                 | 1,36     | 0,8                | 1,6        | 0,71        |
|                 | 1,5      | 0,89               | 0,95       | 1,56        |
|                 | 0,67     | 0,99               | 0,64       | 0,62        |

Fig 4B. % IFN $\gamma$ + of CD3+CD4+

|                 | Rat IgG1 | $\alpha$ -IL-6R Ab | sIL-21R.Fc | Combination |
|-----------------|----------|--------------------|------------|-------------|
| Early treatment | 4,6      | 2,12               | 5,4        | 10,6        |
|                 | 9,67     | 4,48               | 7,71       | 7,5         |
|                 | 6,35     | 7,54               | 0          | 8,89        |
|                 | 4,6      | 2,45               | 5,17       | 6,76        |
|                 | 5,49     | 8,56               | 7,16       | 15,1        |
| Late treatment  | 8,02     | 11,8               | 8,7        | 4,89        |
|                 | 9,24     | 6,79               | 8,13       | 9,12        |
|                 | 3,34     | 3,79               | 6,19       | 4,84        |
|                 | 6,25     | 6,71               | 6,19       | 8,16        |
|                 | 5,19     | 6,25               | 4,04       | 3,53        |

Fig 4C. CII Antibody titer (OD/50)

|           | Rat IgG1 | TNF $\alpha$ inhibitor | $\alpha$ -IL-6R Ab | sIL-21R.Fc | Combination |
|-----------|----------|------------------------|--------------------|------------|-------------|
| IgG1      | 299,1    | 1215                   | 2429               | 577        | 453,8       |
|           | 508,2    | 437,5                  | 143,4              | 1699       | 272,1       |
|           | 1544     | 102,5                  | 3007               | 723,9      | 139,6       |
|           | 274,3    | 104                    | 46,38              | 950,1      | 69,06       |
|           | 67,03    | 70,18                  | 29,04              | 48,26      | 135,8       |
| IgG2a     | 759      | 305,6                  | 2670               | 394        | 308,3       |
|           | 358,9    | 221,6                  | 160,8              | 1245       | 246,5       |
|           | 772,4    | 21,47                  | 243,9              | 895,1      | 177,5       |
|           | 98,41    | 30,36                  | 155,6              | 625,8      | 52,65       |
|           | 37,7     | 109                    | 105,7              | 206        | 224,2       |
| IgG Total | 548,7    | 318,7                  | 2879               | 553,8      | 267         |
|           | 428,7    | 342,4                  | 72,4               | 2258       | 351,4       |
|           | 1517     | 30,17                  | 855,8              | 804,5      | 114,9       |
|           | 198,9    | 18,16                  | 89,3               | 842,3      | 23,4        |
|           | 36,13    | 63,61                  | 37,1               | 208,5      | 77,71       |

Figure 5

Fig 5A. Arthritis incidence (%)

| Days after immunization | Rat IgG1 | TNF $\alpha$ inhibitor | $\alpha$ -IL-6R Ab | sIL-21R.Fc | Combination |
|-------------------------|----------|------------------------|--------------------|------------|-------------|
| 16                      | 20       | 0                      | 0                  | 20         | 0           |
| 18                      | 40       | 0                      | 0                  | 40         | 0           |
| 21                      | 60       | 0                      | 0                  | 60         | 0           |
| 23                      | 60       | 0                      | 0                  | 80         | 0           |
| 25                      | 80       | 0                      | 0                  | 80         | 0           |
| 28                      | 100      | 0                      | 40                 | 80         | 0           |
| 30                      | 100      | 20                     | 60                 | 100        | 20          |
| 32                      | 100      | 20                     | 60                 | 100        | 20          |
| 35                      | 100      | 40                     | 60                 | 100        | 40          |

Fig 5B. Macroscopic score (0-8)

| Rat IgG1 | TNF $\alpha$ inhibitor | $\alpha$ -IL-6R Ab | sIL-21R.Fc | Combination |
|----------|------------------------|--------------------|------------|-------------|
| 3,75     | 2,25                   | 5,75               | 3,5        | 2           |
| 3,75     | 0,25                   | 2,5                | 4,75       | 0,75        |
| 4        | 0                      | 1,5                | 5,25       | 0           |
| 2,75     | 0                      | 0                  | 4          | 0           |
| 1,75     | 0                      | 0                  | 3          | 0           |

Fig 5C. Radiological damage (0-8)

| Rat IgG1 | TNF $\alpha$ inhibitor | $\alpha$ -IL-6R Ab | sIL-21R.Fc | Combination |
|----------|------------------------|--------------------|------------|-------------|
| 0,75     | 1                      | 1,75               | 2,5        | 1,75        |
| 5        | 0,75                   | 1                  | 3,5        | 0           |
| 3,5      | 0,5                    | 0                  | 4          | 0,25        |
| 2,25     | 0                      | 0,25               | 4          | 0           |
| 1,75     | 0                      | 0                  | 0          | 0,25        |

Fig 5D. Histological score (0-3)

|              | Rat IgG1 | TNF $\alpha$ inhibitor | $\alpha$ -IL-6R Ab | sIL-21R.Fc | Combination |
|--------------|----------|------------------------|--------------------|------------|-------------|
| Inflammation | 0,75     | 0,5                    | 2,25               | 2,25       | 0,25        |
|              | 2,25     | 0,5                    | 2,75               | 2,25       | 2,25        |
|              | 2,75     | 0                      | 0,25               | 2,75       | 0,25        |
|              | 2        | 0,25                   | 0,75               | 1,25       | 0,25        |
|              | 1        | 0                      | 0,75               | 2          | 0           |
|              | 1,75     | 0,25                   | 0,25               | 2          | 0           |
|              | 2,75     | 0                      | 0,25               | 2,5        | 0           |
|              | 0,5      | 0                      | 0                  | 2,75       | 0           |
|              | 1,5      | 0                      | 0,25               | 0,25       | 0           |
|              | 0,25     | 0                      | 0,25               | 1          | 0,25        |
| PG Depletion | 0,75     | 0,5                    | 2,5                | 2,5        | 0           |
|              | 2,5      | 0                      | 2,75               | 2,5        | 2,5         |
|              | 2,75     | 0                      | 0                  | 2,75       | 0           |
|              | 3        | 0                      | 1,25               | 3          | 0           |
|              | 2,25     | 0                      | 0,625              | 3          | 0           |
|              | 3        | 0                      | 0                  | 3          | 0           |
|              | 2,75     | 0                      | 0                  | 3          | 0           |
|              | 0        | 0                      | 0                  | 2,75       | 0           |
|              | 1        | 0                      | 0                  | 0          | 0           |
|              | 0        | 0                      | 0                  | 1          | 0           |
| Bone erosion | 0,81     | 0,58                   | 0,67               | 1,19       | 0,44        |
|              | 0,79     | 0,56                   | 1,75               | 1,38       | 1,21        |
|              | 2        | 0,69                   | 0,56               | 1,71       | 0,29        |
|              | 2,46     | 0,75                   | 0,88               | 1,67       | 0,71        |
|              | 0,48     | 0,63                   | 0,52               | 1,46       | 0,69        |
|              | 1,88     | 0,63                   | 0,69               | 2,29       | 0,58        |
|              | 1,67     | 0,31                   | 0,82               | 2,42       | 0,63        |
|              | 0,38     | 0,42                   | 0,85               | 1,83       | 0,88        |
|              | 1,08     | 0,9                    | 1,06               | 0,75       | 0,67        |
|              | 0,67     | 0,5                    | 0,54               | 0,56       | 0,46        |

Figure 6

Fig 6A. Arthritis incidence (%)

| Days after immunization | Rat IgG1 | TNF $\alpha$ inhibitor | $\alpha$ -IL-6R Ab | sIL-21R.Fc | Combination |
|-------------------------|----------|------------------------|--------------------|------------|-------------|
| 16                      | 0        | 0                      | 0                  | 0          | 0           |
| 18                      | 20       | 0                      | 0                  | 0          | 0           |
| 21                      | 60       | 20                     | 20                 | 40         | 20          |
| 23                      | 100      | 40                     | 100                | 100        | 60          |
| 25                      | 100      | 60                     | 100                | 100        | 60          |
| 28                      | 100      | 60                     | 100                | 100        | 60          |
| 30                      | 100      | 60                     | 100                | 100        | 60          |

Fig 6B. Macroscopic score (0-8)

| Rat IgG1 | TNF $\alpha$ inhibitor | $\alpha$ -IL-6R Ab | sIL-21R.Fc | Combination |
|----------|------------------------|--------------------|------------|-------------|
| 1,5      | 2                      | 5,5                | 4          | 5,5         |
| 3,75     | 3,75                   | 2,5                | 6          | 7,25        |
| 3        | 1,5                    | 2,25               | 5,5        | 4,5         |
| 4,25     | 0                      | 4,5                | 7,25       | 0           |
| 2        | 0                      | 3,5                | 5,5        | 0           |

Fig 6C. Radiological damage (0-8)

| Rat IgG1 | TNF $\alpha$ inhibitor | $\alpha$ -IL-6R Ab | sIL-21R.Fc | Combination |
|----------|------------------------|--------------------|------------|-------------|
| 0,75     | 0,5                    | 3,5                | 3          | 2,25        |
| 2        | 1                      | 1                  | 2,25       | 3,75        |
| 3,25     | 0,5                    | 1,5                | 2,25       | 2           |
| 1,75     | 0,5                    | 2,75               | 3,75       | 1,25        |
| 2        | 0,5                    | 2,75               | 2,25       | 0           |

Fig 6D. Histological score (0-3)

|              | Rat IgG1 | TNF $\alpha$ inhibitor | $\alpha$ -IL-6R Ab | sIL-21R.Fc | Combination |
|--------------|----------|------------------------|--------------------|------------|-------------|
| Inflammation | 1        | 0                      | 1,75               | 2,5        | 1,75        |
|              | 0,25     | 0                      | 1,5                | 2,25       | 1,25        |
|              | 0,5      | 0,25                   | 2                  | 2,25       | 2,25        |
|              | 2,25     | 0                      | 0,25               | 1,75       | 2,25        |
|              | 0,5      | 0                      | 0,25               | 2,75       | 1,5         |
|              | 3        | 0                      | 1,5                | 2,5        | 0           |
|              | 2,25     | 0,25                   | 2,25               | 2,5        | 0,25        |
|              | 0        | 0,25                   | 0,5                | 2,25       | 0           |
|              | 0        | 0,25                   | 0,25               | 1,75       | 0           |
|              | 2,25     | 0,25                   | 2                  | 2,25       | 0           |
| PG Depletion | 0,75     | 0                      | 1,75               | 2,75       | 1,75        |
|              | 0        | 0                      | 2,5                | 3          | 1           |
|              | 0,25     | 0                      | 2,25               | 2,25       | 2,5         |
|              | 2,5      | 0,25                   | 0                  | 2,25       | 2,5         |
|              | 0,75     | 0                      | 0,25               | 3          | 1,75        |
|              | 3        | 0                      | 2,25               | 2,5        | 0           |
|              | 2,75     | 0                      | 2,75               | 2,5        | 0           |
|              | 0        | 0,25                   | 0,5                | 2,75       | 0           |
|              | 0        | 0                      | 0                  | 2          | 0           |
|              | 2,75     | 0                      | 2,25               | 2,75       | 0,25        |
| Bone erosion | 0,71     | 0,46                   | 1,21               | 1,33       | 1           |
|              | 0,38     | 0,72                   | 0,81               | 1,63       | 1,54        |
|              | 0,38     | 0,79                   | 1,79               | 1,67       | 1,5         |
|              | 1,38     | 0,79                   | 0,71               | 1,5        | 1,63        |
|              | 0,75     | 0,46                   | 0,54               | 1,67       | 1,5         |
|              | 2,38     | 0,75                   | 1,17               | 1,42       | 0,54        |
|              | 1,88     | 0,46                   | 1,67               | 1,79       | 0,56        |
|              | 0,92     | 0,58                   | 0,46               | 1,29       | 0,42        |
|              | 0,75     | 0,58                   | 0,58               | 0,92       | 0,54        |
|              | 1,63     | 0,29                   | 1,17               | 1,42       | 0,33        |
